# Supplementary material for: Regulation of oxygen vacancies in nitrogen-doped Ga2O3 films for high-performance MSM solar-blind UV photodetectors
Source: Royal Society of Chemistry journal article supplement (doi:10.1039/d3tc00345k), 2023-01-01
Supplement: d3tc00345k1.pdf [file d3tc00345k1.pdf]

## Supporting information

### **Regulation of oxygen vacancies in Nitrogen-doped Ga<sub>2</sub>O<sub>3</sub> films for high-performance MSM solar-blind UV photodetectors**

*Jinjin Wang<sup>a</sup>, Xueqiang Ji<sup>a</sup>, Song Qi<sup>a</sup>, Zhitong Li<sup>a</sup>, Zuyong Yan<sup>b\*</sup>, Mengcheng Li<sup>a</sup>, Xu Yan<sup>a</sup>, Aoxue  
Zhong<sup>a</sup>, Chao Lu<sup>a</sup>, Xiaohui Qi<sup>a</sup>, and Peigang Li<sup>a\*</sup>*

<sup>a</sup> School of Integrated Circuits & State Key Laboratory of Information Photonics and Optical  
Communications, Beijing University of Posts and Telecommunications, Beijing 100876, China

<sup>b</sup> School of Science, Lanzhou University of Technology, Lanzhou 730050, China.

#### **Corresponding Authors:**

**\*E-mail:** [pgli@bupt.edu.cn](mailto:pgli@bupt.edu.cn) (P.G.L)

**\*E-mail:** [zyyan@lut.edu.cn](mailto:zyyan@lut.edu.cn) (Z.Y.Y)

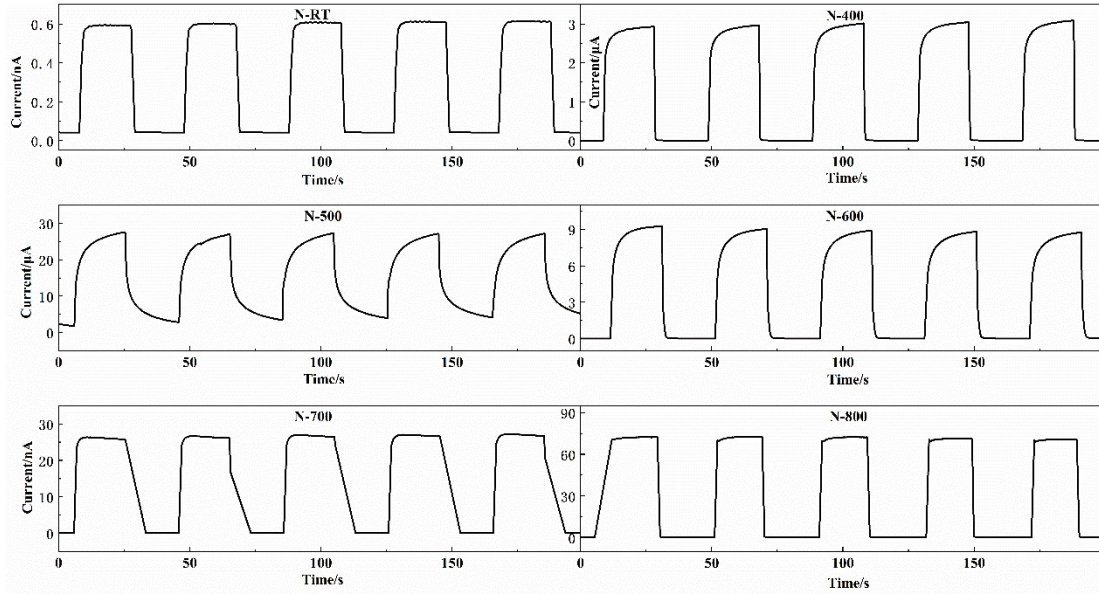

Figure S1 The fitting curves of the Ga<sub>2</sub>O<sub>3</sub> films of various growth temperatures with the 900  $\mu\text{Wcm}^{-2}$  light intensities at 5 V bias.

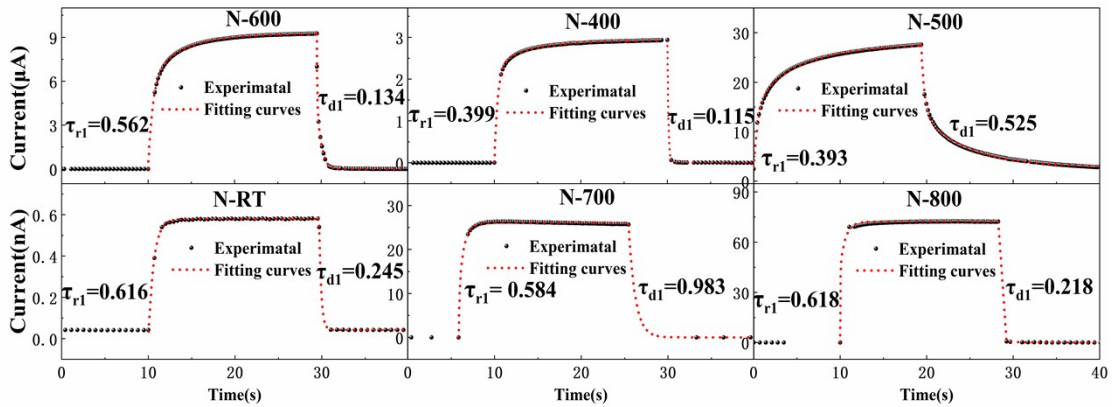

Figure S2 I-t curves of the photodetector of various growth temperatures with the 900  $\mu\text{Wcm}^{-2}$  light intensities at 5 V bias.

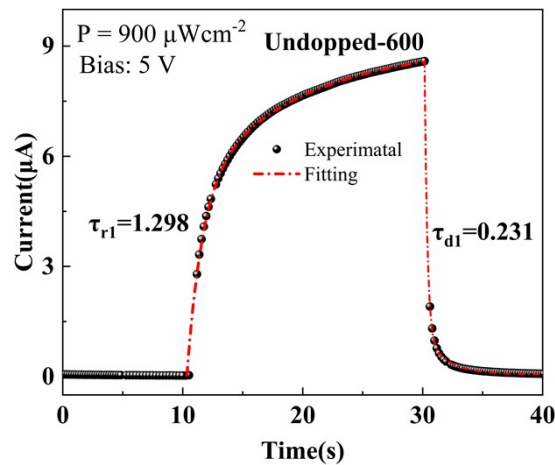

Figure S3 The fitting curves of the Ga<sub>2</sub>O<sub>3</sub> films of undoped-600 with the 900  $\mu\text{Wcm}^{-2}$  light intensities at 5 V bias.

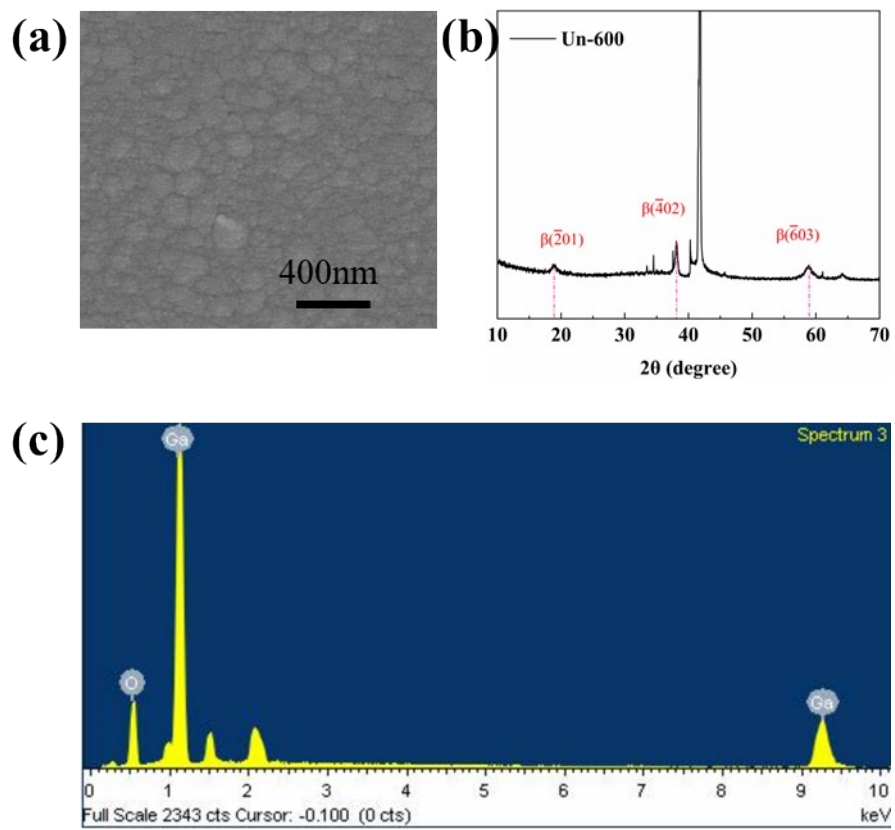

Figure S4 (a) SEM, (b)XRD pattern, (C) EDS of Undoped-600.
